# Supplementary material
Source: PubMed Central journal article supplement (PMC6817305)

## Appendix 1: Steps for Group Level Assessment (GLA)

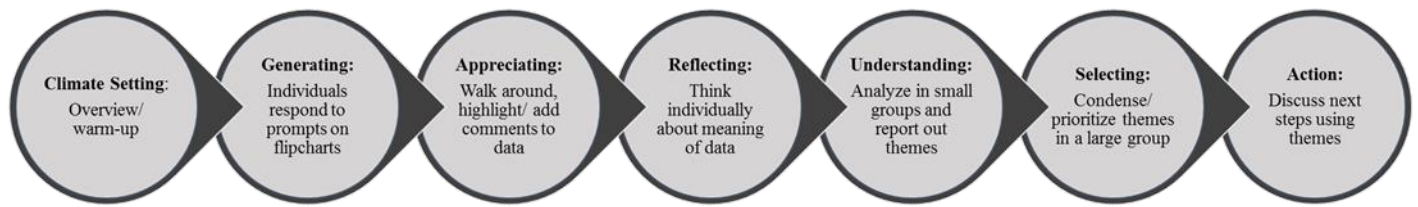

Supplement: Choe_LEP_GLA_Appendix_GLA_Steps_Figure.pdf [file Choe_LEP_GLA_Appendix_GLA_Steps_Figure.pdf]
